# Supplementary material for: In vivo genome editing improves motor function and extends survival in a mouse model of ALS
Source: PubMed Central journal article supplement — Sci Adv. 2017 Dec 20;3(12):eaar3952. doi: 10.1126/sciadv.aar3952 (PMC5738228; doi:10.1126/sciadv.aar3952), 2017-12-20
Supplement: aar3952_SM.pdf [file aar3952_SM.pdf]

## Supplementary Materials for

### **In vivo genome editing improves motor function and extends survival in a mouse model of ALS**

Thomas Gaj, David S. Ojala, Freja K. Ekman, Leah C. Byrne, Prajit Limsirichai, David V. Schaffer

Published 20 December 2017, *Sci. Adv.* **3**, eaar3952 (2017)

DOI: 10.1126/sciadv.aar3952

#### **This PDF file includes:**

- fig. S1. Designing sgRNA to target the human SOD1 gene.
- fig. S2. CRISPR-Cas9 reduced mutant SOD1 expression in NSC-34-G93A-SOD1 cells by genome editing.
- fig. S3. Quality control of AAV vectors.
- fig. S4. Mutant SOD1 expression in the spinal cord of untreated G93A-SOD1 mice.
- fig. S5. Systemic administration of AAV9-SaCas9-hSOD1 to neonatal G93A-SOD1 mice leads to SaCas9 expression in ChAT<sup>+</sup> cells in the spinal cord.
- fig. S6. Systemic administration of AAV9-SaCas9-hSOD1 to neonatal G93A-SOD1 mice leads to SaCas9 expression in  $\beta$ 3-tubulin<sup>+</sup> fibers in the spinal cord.
- fig. S7. Systemic administration of AAV9-SaCas9-hSOD1 to neonatal G93A-SOD1 mice leads to limited SaCas9 expression in GFAP<sup>+</sup> astrocytes in the spinal cord.
- fig. S8. CRISPR-Cas9-mediated genome editing reduced mutant SOD1 protein in G93A-SOD1 mice.
- fig. S9. Genome editing did not affect mouse SOD1 protein in G93A-SOD1 mice.
- fig. S10. Background modification at candidate OT sites in CRISPR-treated G93A-SOD1 mice.
- fig. S11. G93A-SOD1 mice treated with AAV9-SaCas9-hSOD1 lose weight at a slower rate after disease onset compared to control mice.
- fig. S12. Systemic administration of AAV9-SaCas9-hSOD1 to neonatal G93A-SOD1 mice did not delay the rate of disease progression.
- fig. S13. G93A-SOD1 mice injected with AAV9-SaCas9-SaCas9 had limited SaCas9 expression in GFAP<sup>+</sup> astrocytes at end stage.

- fig. S14. Mutant SOD1 inclusion bodies were visible in end-stage spinal cord sections from CRISPR-treated G93A-SOD1 mice.
- table S1. Oligonucleotides used in this study.
- table S2. External primers for MiSeq analysis.
- table S3. Internal primers for MiSeq analysis.

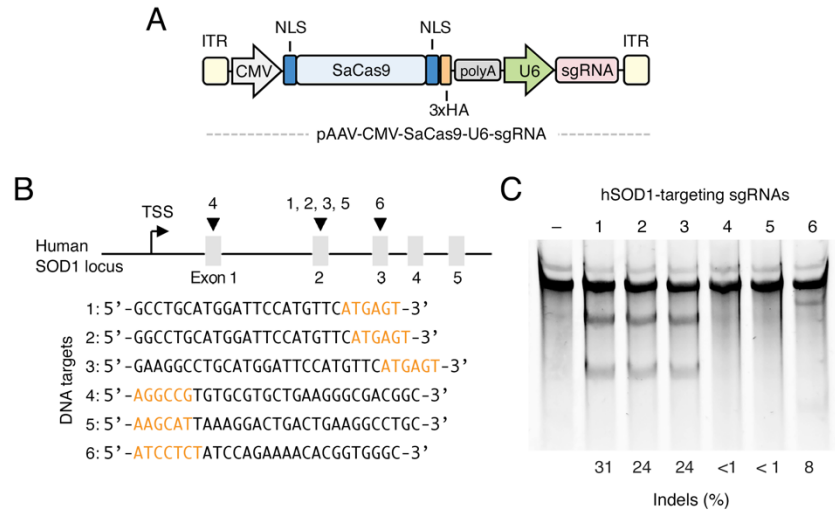

**fig. S1. Designing sgRNA to target the human SOD1 gene.** (A) AAV vector schematic. Abbreviations are as follows: ITR, inverted terminal repeat; CMV, cytomegalovirus promoter; NLS, nuclear localization signal sequence; 3xHA, three tandem repeats of the human influenza hemagglutinin (HA) epitope tag. (B) Schematic representation of the human SOD1 locus and candidate SaCas9 cleavage sites. Arrowheads indicate the exon in which each sgRNA target site is located. Orange bases denote protospacer-adjacent motif (PAM). (C) Frequency of hSOD1<sup>G93A</sup> modification in neuroblastoma-spinal cord (NSC)-34-G93A-SOD1 cells transiently transfected with pAAV-CMV-SaCas9-U6-sgRNA-1-to-6. “-” indicates negative control. Indel frequencies were determined by the Surveyor nuclease assay. sgRNA-1 was used for *in vivo* studies.



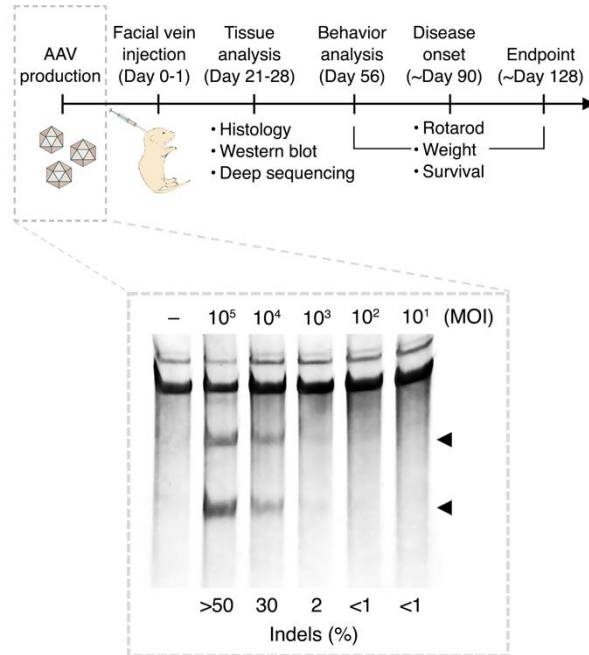

**fig. S3. Quality control of AAV vectors.** (Top) Experimental timeline for in vivo studies. AAV9 vectors encoding CRISPR-Cas9 were evaluated for their ability to modify hSOD1<sup>G93A</sup> in cell culture prior to being administered to G93A-SOD1 mice. Inset shows the modification frequency of hSOD1<sup>G93A</sup> cDNA in NSC-34-G93A-SOD1 cells infected with various multiplicities of infections (MOIs) of AAV9-SaCas9-hSOD1. Indel frequencies were determined by the Surveyor nuclease assay. “-” indicates negative control. Arrowheads indicate positions of the expected cleavage products.

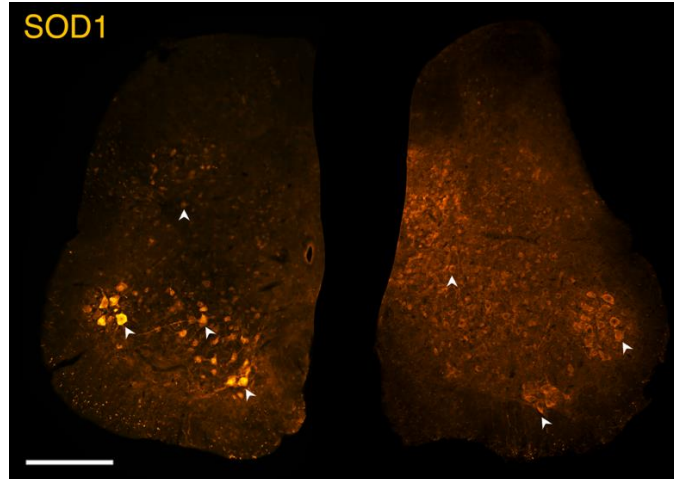

**fig. S4. Mutant SOD1 expression in the spinal cord of untreated G93A-SOD1 mice.** Immunofluorescent staining of representative lumbar (left) and thoracic (right) spinal cord hemisections from untreated P28 G93A-SOD1 mice. Arrowheads point to representative SOD1<sup>+</sup> cells. Scale bar, 200  $\mu$ m.

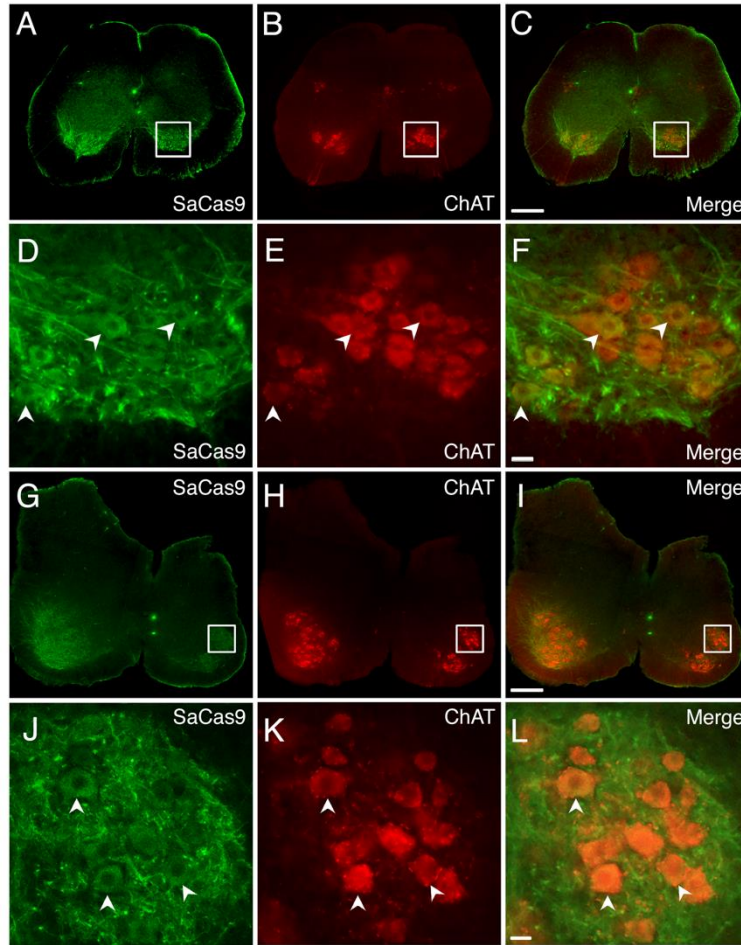

**fig. S5. Systemic administration of AAV9-SaCas9-hSOD1 to neonatal G93A-SOD1 mice leads to SaCas9 expression in ChAT<sup>+</sup> cells in the spinal cord.** (A-L) Immunofluorescent staining of (A-F) thoracic and (G-L) lumbar spinal cord sections four weeks after G93A-SOD1 mice were injected with AAV9-SaCas9-hSOD1 ( $n = 3$ ) or AAV9-SaCas9-mRosa26 ( $n = 3$ ) via facial vein at P0-P1. Insets show high magnification images from (D-F) thoracic and (J-L) lumbar spinal cord sections. Arrowheads point to representative SaCas9<sup>+</sup> and ChAT<sup>+</sup> cells. SaCas9 expression was observed in ~74% of examined ChAT<sup>+</sup> cells ( $n = 659, 568$  and  $872$  ChAT<sup>+</sup> cells in lumbar, thoracic and cervical spinal cord sections, respectively) from three different mice. Scale bars, (C, I) 200  $\mu\text{m}$ , (F, L) 20  $\mu\text{m}$ .



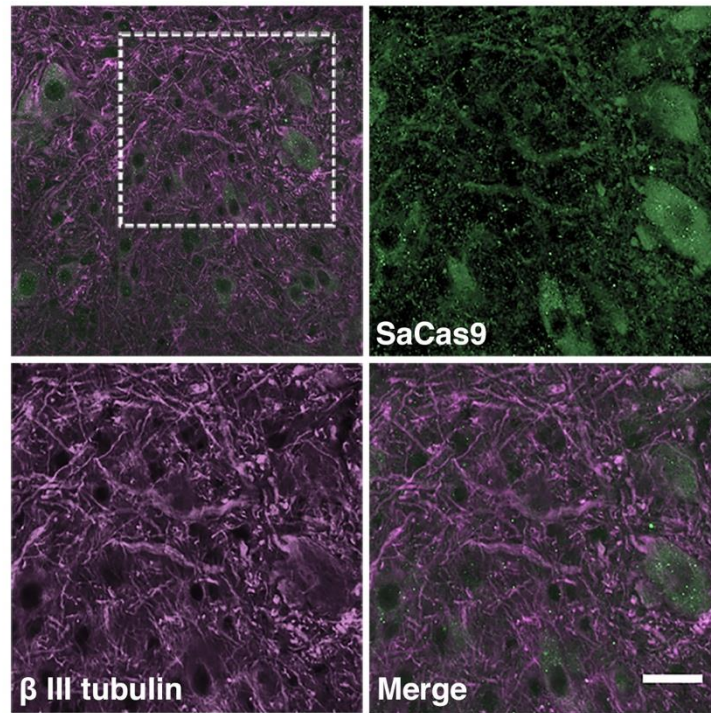

**fig. S6. Systemic administration of AAV9-SaCas9-hSOD1 to neonatal G93A-SOD1 mice leads to SaCas9 expression in  $\beta$ 3-tubulin<sup>+</sup> fibers in the spinal cord.** Immunofluorescent staining of thoracic spinal cord sections four weeks after G93A-SOD1 mice were injected with AAV9-SaCas9-hSOD1 ( $n = 3$ ) or AAV9-SaCas9-mRosa26 ( $n = 3$ ) via facial vein at P0-P1. Insets show high-magnification images. Scale bar, 25  $\mu$ m.



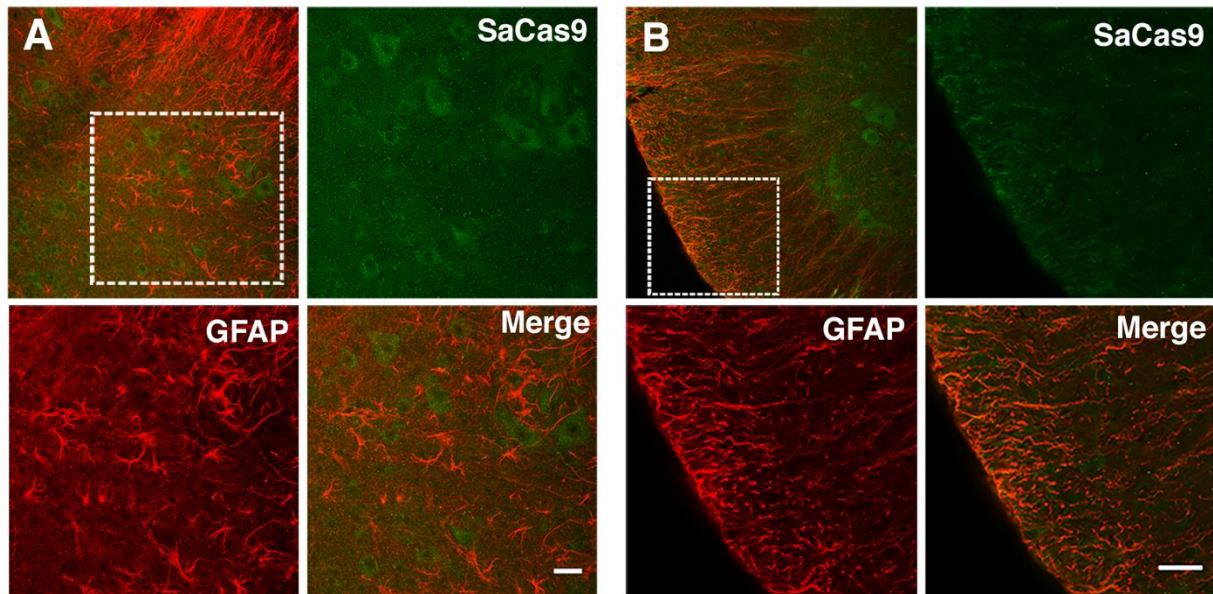

**fig. S7. Systemic administration of AAV9-SaCas9-hSOD1 to neonatal G93A-SOD1 mice leads to limited SaCas9 expression in GFAP<sup>+</sup> astrocytes in the spinal cord.**

Immunofluorescent staining of the (A) anterior grey column and (B) white matter four weeks after G93A-SOD1 mice were injected with AAV9-SaCas9-hSOD1 ( $n = 3$ ) or AAV9-SaCas9-mRosa26 ( $n = 3$ ) via facial vein at P0-P1. Insets show high-magnification images. Scale bar, 25  $\mu\text{m}$ .

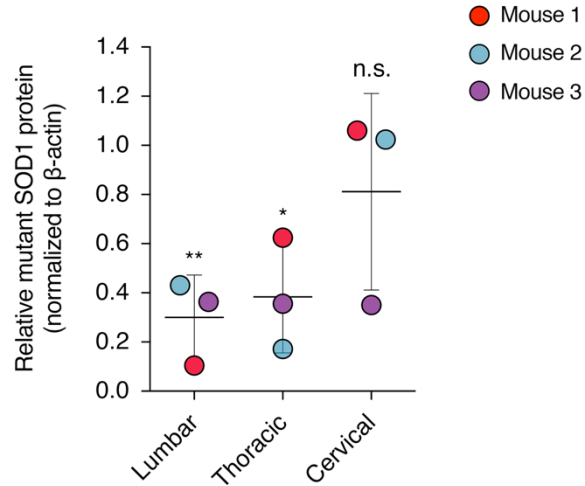

**fig. S8. CRISPR-Cas9–mediated genome editing reduced mutant SOD1 protein in G93A-SOD1 mice.** Quantitation of mutant SOD1 protein by western blot of lumbar, thoracic and cervical spinal cord lysate from G93A-SOD1 mice injected with AAV9-SaCas9-hSOD1 via facial vein ( $n = 3$ ). Circles represent one of three individual mice. Mutant SOD1 protein in each lane was normalized to  $\beta$ -actin and compared to SOD1 protein from either the lumbar, thoracic or cervical spinal cord lysate of G93A-SOD1 mice injected with AAV9-SaCas9-mRosa26 ( $n = 3$ ). Mean SOD1 protein values are indicated by the horizontal lines, and error bars represent S.D.  $**P = 0.001$ ;  $*P < 0.05$ ; n.s. indicates  $P > 0.05$ ; two-way paired t-test.

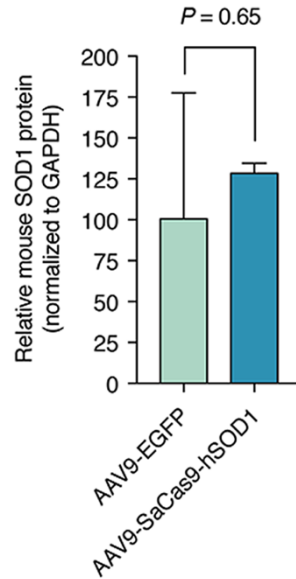

**fig. S9. Genome editing did not affect mouse SOD1 protein in G93A-SOD1 mice.** Western blot quantitation of native mouse SOD1 protein in whole spinal cord lysate four weeks after G93A-SOD1 mice were injected with AAV9-SaCas9-hSOD1 and AAV9-EGFP via facial vein at P0-P1. Mouse SOD1 protein was normalized to GAPDH in each lane. Values are means of three independent replicates, and error bars represent S.D. *P*-value calculated by two-way t-test.

**A**

hSOD1 GCCTGCATGGATTCCATGTTTCATGAGT  
mSOD1 GCCAGCATGGGTTCCACGTCCATCAGT Chr 16:90220742  
OT1 GCCTGCATG--TTCCATTTTCGAGAAT Chr 8:78319778  
OT2 GCCTCCATGGATATCCATGTGCATGGGT Chr 7:81747567  
OT3 GCCTGCATGGGTACCATG--CGGGAGT Chr 4:139152867  
OT4 GCCAG-ATGGATTCCATGCTCAGGAGT Chr 5:72856043  
OT5 GCCTT--TGGATTCCAAGTTCAGGGAT Chr 16:18970882  
OT6 GCCTCCATGGTIT--ATGTTCCCTGAAT Chr 1:166902806  
OT7 GCCTGCAT--ATTCCAAGTGTCTGGGAT Chr 15:41362712  
OT8 GCCTCCATG--TTCCATGTGCTAGGAT Chr 10:62443153  
OT9 GCATGCATG--TTCTTGTTCAGAGT Chr 6:34213859  
OT10 G-CTGCATGGATCCCAgTTCCAGGGT Chr 6:95468813  
OT11 GCCTACATGGAGTCCA--TTCTTGAAT Chr 9:75741573  
OT12 GCCTCCACG--TTCCATGTTCTGGGAT Chr 11:69006483

**B**

|       | AAV9-SaCas9-hSOD1 | AAV9-EGFP       | P-value |
|-------|-------------------|-----------------|---------|
| mSOD1 | 0.013% ± 0.003%   | 0.011% ± 0.002% | 0.391   |
| OT1   | 0.020% ± 0.004%   | 0.014% ± 0.002% | 0.158   |
| OT2   | 0.018% ± 0.005%   | 0.013% ± 0.003% | 0.432   |
| OT3   | 0.018% ± 0.004%   | 0.017% ± 0.003% | 0.746   |
| OT4   | 0.008% ± 0.003%   | 0.008% ± 0.002% | 0.866   |
| OT5   | 0.033% ± 0.006%   | 0.034% ± 0.006% | 0.848   |
| OT6   | 1.164% ± 0.091%   | 1.316% ± 0.111% | 0.141   |
| OT7   | 0.022% ± 0.004%   | 0.017% ± 0.003% | 0.159   |
| OT8   | 0.022% ± 0.004%   | 0.019% ± 0.002% | 0.357   |
| OT9   | 0.009% ± 0.005%   | 0.007% ± 0.001% | 0.725   |
| OT10  | 0.018% ± 0.005%   | 0.019% ± 0.004% | 0.939   |
| OT11  | 0.016% ± 0.004%   | 0.051% ± 0.108% | 0.696   |
| OT12  | 0.018% ± 0.003%   | 0.024% ± 0.011% | 0.478   |

**fig. S10. Background modification at candidate OT sites in CRISPR-treated G93A-SOD1 mice.** (A) Sequence and chromosomal location of potential OT sites identified by Cas-OFFinder. Mismatches from the on-target site in hSOD1 are colored pink. (B) Indel frequencies at candidate OT sites were measured by deep sequencing. Indels were measured within a 5 bp window around the predicted SaCas9 cleavage site in each OT site using CRISPResso. Frequencies are means from three independent replicates, and error bars indicate S.D. *P*-values calculated using two-tailed *t*-test.

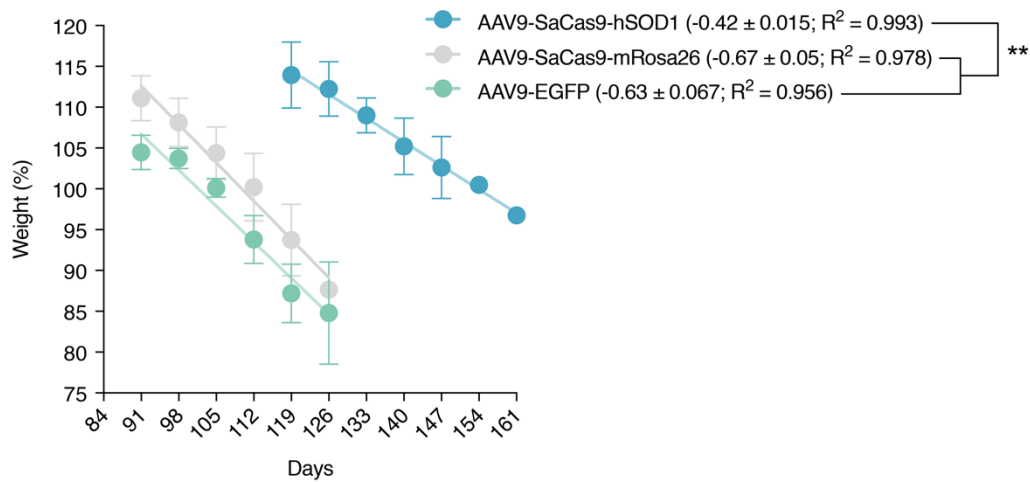

**fig. S11. G93A-SOD1 mice treated with AAV9-SaCas9-hSOD1 lose weight at a slower rate after disease onset compared to control mice.** Linear regression analysis of post-disease onset weights of G93A-SOD1 mice injected with AAV9-SaCas9-hSOD1 ( $n = 7$ ), AAV9-SaCas9-mRosa26 ( $n = 7$ ) or AAV9-EGFP ( $n = 7$ ) via facial vein at P0-P1. Mean weights were normalized to the average 56-day values for each group. Values are means and error bars indicate S.E.M. Solid lines show the linear regression fit within each group. The slope values reported in the legend indicate weight loss (%) per day. Linear regression analysis was performed using Prism 7.  $**P < 0.005$ .

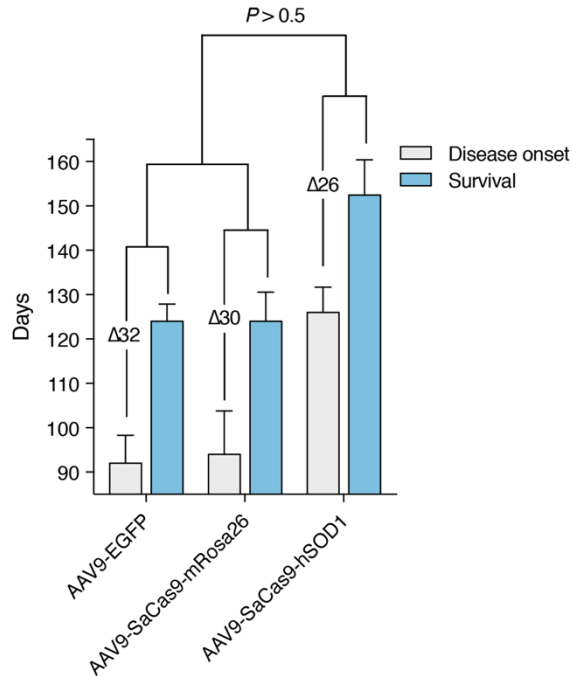

**fig. S12. Systemic administration of AAV9-SaCas9-hSOD1 to neonatal G93A-SOD1 mice did not delay the rate of disease progression.** Length of time from disease onset to death ( $\Delta$ ) in G93A-SOD1 mice injected with AAV9-SaCas9-hSOD1 ( $n = 7$ ), AAV9-SaCas9-mRosa26 ( $n = 7$ ) or AAV9-EGFP ( $n = 7$ ) via the facial vein at P0-P1. Values are means and error bars indicate S.E.M.  $P$ -values calculated by one-way ANOVA followed by Tukey's post-hoc analysis.

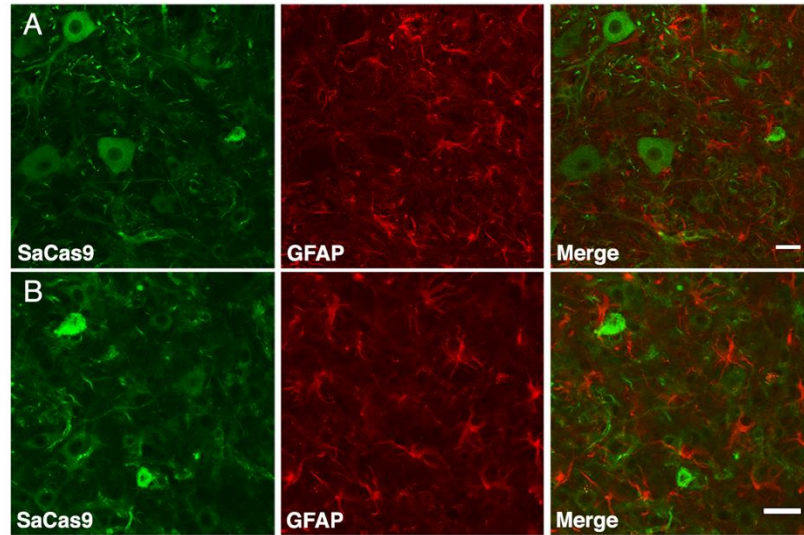

**fig. S13. G93A-SOD1 mice injected with AAV9-SaCas9-SaCas9 had limited SaCas9 expression in GFAP<sup>+</sup> astrocytes at end stage.** Immunofluorescent staining of end-stage spinal cord sections after G93A-SOD1 mice were injected with AAV9-SaCas9-hSOD1 via the facial vein at P0-P1. Scale bar, 25  $\mu$ m.

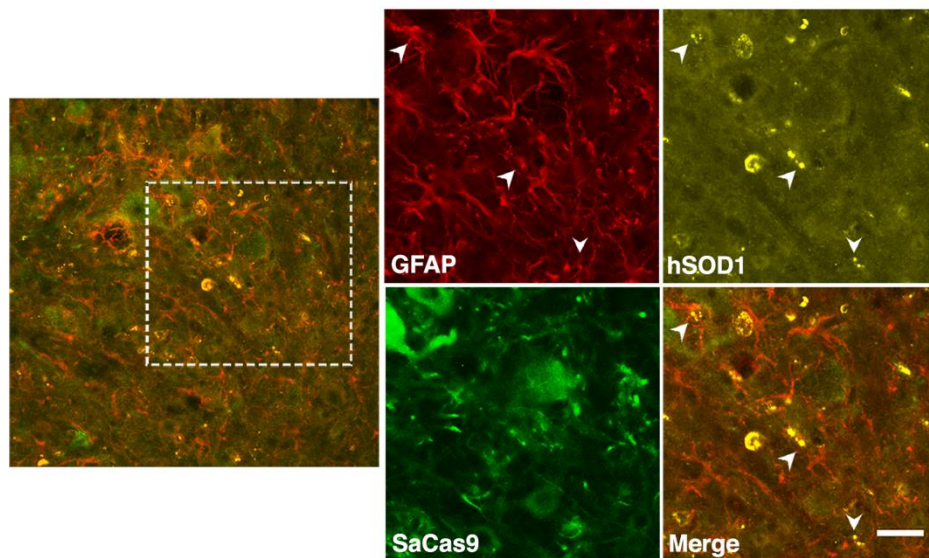

**fig. S14. Mutant SOD1 inclusion bodies were visible in end-stage spinal cord sections from CRISPR-treated G93A-SOD1 mice.** Immunofluorescent staining of end-stage spinal cord sections after G93A-SOD1 mice were injected with AAV9-SaCas9-hSOD1 via the facial vein at P0-P1. Arrowheads indicate GFAP<sup>+</sup> cells with immunoreactive mutant SOD1 inclusion bodies. Insets show high-magnification images. Scale bar, 25  $\mu$ m.



**table S1. Oligonucleotides used in this study.**

| Name              | Sequence (5' to 3')           |
|-------------------|-------------------------------|
| hSOD1 sgRNA 1 Fwd | CACCGCCTGCATGGATTCCATGTTC     |
| hSOD1 sgRNA 1 Rev | AAACGAACATGGAATCCATGCAGGC     |
| hSOD1 sgRNA 2 Fwd | CACCGGCCTGCATGGATTCCATGTTC    |
| hSOD1 sgRNA 2 Rev | AAACGAACATGGAATCCATGCAGGCC    |
| hSOD1 sgRNA 3 Fwd | CACCGAAGGCCTGCATGGATTCCATGTTC |
| hSOD1 sgRNA 3 Rev | AAACGAACATGGAATCCATGCAGGCCTTC |
| hSOD1 sgRNA 4 Fwd | CACCGCCGTCGCCCTTCAGCACGCACA   |
| hSOD1 sgRNA 4 Rev | AAACTGTGCGTGCTGAAGGGCGACGGC   |
| hSOD1 sgRNA 5 Fwd | CACCGCAGGCCTTCAGTCAGTCCTTTA   |
| hSOD1 sgRNA 5 Rev | AAACTAAAGGACTGACTGAAGGCCTGC   |
| hSOD1 sgRNA 6 Fwd | CACCGCCCACCGTGTTTTCTGGATA     |
| hSOD1 sgRNA 6 Rev | AAACTATCCAGAAAACACGGTGGGC     |
| pcDNA-hSOD1 Fwd   | ACTCACGGGGATTTCCAAGTCTCCA     |
| BGH-Rev           | TAGAAGGCACAGTCGAGG            |
| CMV-Fwd           | CGCAAATGGGCGGTAGGCGTG         |
| pcDNA-hSOD1-Rev   | GCAATGGTCTCCTGAGAGTGAGATC     |
| hSOD1-EcoRI-Fwd   | TGGTACCGAGCTCGGATCCACTAGT     |
| qPCR-CMV-Fwd      | ATGGTGATGCGGTTTTGGCAG         |
| qPCR-CMV-Rev      | GGCGGAGTTGTTACGACATTTTGG      |
| hSOD1-Tg-Fwd      | GGAGGTTCACTGGCTAGAAAGTGGTCA   |
| hSOD1-Tg-Rev      | AGCGACAGAGCAAGACCCTTTCTC      |

**table S2. External primers for MiSeq analysis.**

| <b>Name</b> | <b>Sequence (5' to 3')</b> | <b>Off target (OT) site</b> |
|-------------|----------------------------|-----------------------------|
| 1-EXT_F     | AGCTACCCTGTTTCCGGGTTTAT    | OT1: chr8:78319778          |
| 1-EXT_R     | CCACGGAGGGGTTTGTTGATTG     | OT1: chr8:78319778          |
| 2-EXT_F     | TGCCATTGGATCCCTTTTCCCT     | OT2: chr7:81747567          |
| 2-EXT_R     | CACTCGCTCTGGCTCATAGGTT     | OT2: chr7:81747567          |
| 3-EXT_F     | GAGTCCTTCCCCTGCTCCAAT      | OT3: chr4:139152867         |
| 3-EXT_R     | GTACACAGACACACATGCAGGC     | OT3: chr4:139152867         |
| 4-EXT_F     | GGCTCTGTGTGGGAGAGTTGAT     | OT4: chr5:72856043          |
| 4-EXT_R     | TTTGGGTCCCATCACGCTGTAT     | OT4: chr5:72856043          |
| 5-EXT_F     | CCATTTGCCTTCCCTGCCTTTT     | OT5: chr16:18970882         |
| 5-EXT_R     | CTCCACTTACAGGCTGGCTCTT     | OT5: chr16:18970882         |
| 6-EXT_F     | GGCCACTATGTGAACACAGTGC     | OT6: chr1:166902806         |
| 6-EXT_R     | CACCCCAACCCTTCCATAACT      | OT6: chr1:166902806         |
| 7-EXT_F     | TCAGTGTTCCCATGGCTAACGT     | OT7: chr15:41362712         |
| 7-EXT_R     | TGGTGGAAATTTTGGCGTCACT     | OT7: chr15:41362712         |
| 8-EXT_F     | CTGTAATGGGATCCGATGCCCT     | OT8: chr10:62443153         |

|          |                             |                                |
|----------|-----------------------------|--------------------------------|
| 8-EXT_R  | ATTCCA CT CAGGCCCTACCAAC    | OT8: chr10:62443153            |
| 9-EXT_F  | TGCTCATGACACACCAACCTCA      | OT9: chr6:34213859             |
| 9-EXT_R  | TGGTTTGCTCAGCCTACTCTCC      | OT9: chr6:34213859             |
| 10-EXT_F | AGTTAGAGGTGGCTGTGAGCTG      | OT10: chr6:95468813            |
| 10-EXT_R | AGTGGATACGTTTGCCTTCCGA      | OT10: chr6:95468813            |
| 11-EXT_F | CTTGCATGCCCCAAATGTGACT      | OT11: chr9:75741573            |
| 11-EXT_R | AAACGAGAACGGGTGGTACTACA     | OT11: chr9:75741573            |
| 12-EXT_F | CCTCCTGAAGGTCTTTCCTGG       | OT12: chr11:69006483           |
| 12-EXT_R | GCTGGAGAGATGGTTCAGTGGT      | OT12: chr11:69006483           |
| 13-EXT_F | GGAGGTTCACTGGCTAGAAAGTGGTCA | hSOD1                          |
| 13-EXT_R | AGCGACAGAGCAAGACCCTTTCTC    | hSOD1                          |
| 14-EXT_F | GCATCTGGCAGCAAGTGTTAGG      | mSOD1: chr16:90220754-90224140 |
| 14-EXT_R | TGTGGAGAAGGGAAGAAGGCAG      | mSOD1: chr16:90220754-90224140 |

**table S3. Internal primers for MiSeq analysis.** Barcodes underlined.

| Name    | Sequence (5' to 3')                                                                                           |
|---------|---------------------------------------------------------------------------------------------------------------|
| 1-INT_F | AATGATACGGCGACCACCGAGATCTACACTCTTTCCCTACACGACGCT<br>CTTCCGATCTATGTTATAGCCAAAGATTAATTTCTCTTTGCTTGAGA           |
| 1-INT_R | CAAGCAGAAGACGGCATAACGAGATGCCTAAGTGACTGGAGTTCAGAC<br>GTGTGCTCTTCCGATCTAATGTTTCTGGCGGTCTTTTTTTTTTTCCCGT<br>G    |
| 2-INT_F | AATGATACGGCGACCACCGAGATCTACACTCTTTCCCTACACGACGCT<br>CTTCCGATCTCTCTCTTGTCAGATGGCTCCCCAC                        |
| 2-INT_R | CAAGCAGAAGACGGCATAACGAGATCTGATCGTGACTGGAGTTCAGAC<br>GTGTGCTCTTCCGATCTTCTTAGTTAATGGCATTAAATACTTTTATTTTT<br>ATT |
| 3-INT_F | AATGATACGGCGACCACCGAGATCTACACTCTTTCCCTACACGACGCT<br>CTTCCGATCTGACTGGTTATGTTGATATATGATCTGTAGTGAATCTTTC         |
| 3-INT_R | CAAGCAGAAGACGGCATAACGAGATA <u>AAGCTA</u> GTGACTGGAGTTCAGAC<br>GTGTGCTCTTCCGATCTTCTGTGTCACCACTTGTTTTTGGTG      |
| 4-INT_F | AATGATACGGCGACCACCGAGATCTACACTCTTTCCCTACACGACGCT<br>CTTCCGATCTTCGAAGTGGGGCTGAGAACCAGG                         |
| 4-INT_R | CAAGCAGAAGACGGCATAACGAGATG <u>TAGCCG</u> TGACTGGAGTTCAGAC<br>GTGTGCTCTTCCGATCTTTCTTCATAGACACTGGGGAATTACC      |
| 5-INT_F | AATGATACGGCGACCACCGAGATCTACACTCTTTCCCTACACGACGCT<br>CTTCCGATCTATCGCCTGAGAGCACACACTGCCCCCT                     |
| 5-INT_R | CAAGCAGAAGACGGCATAACGAGAT <u>TTGACT</u> GTGACTGGAGTTCAGAC<br>GTGTGCTCTTCCGATCTTAGGAATGAGGCCTAAGAAAAAGAGTGAG   |
| 6-INT_F | AATGATACGGCGACCACCGAGATCTACACTCTTTCCCTACACGACGCT<br>CTTCCGATCTGTGACACCCCAAGTTAATTCTGATTGGTATTGGAA             |
| 6-INT_R | CAAGCAGAAGACGGCATAACGAGAT <u>TGACAT</u> GTGACTGGAGTTCAGAC<br>GTGTGCTCTTCCGATCTCCTGGCACATGGCTACTACCT           |

|          |                                                                                                               |
|----------|---------------------------------------------------------------------------------------------------------------|
| 7-INT_F  | AATGATACGGCGACCACCGAGATCTACACTCTTTCCCTACACGACGCT<br>CTTCCGATCTTGCATCGAAACATTGGTGACCTGAAACTTCCTATGT            |
| 7-INT_R  | CAAGCAGAAGACGGCATAACGAGATCTCTACGTGACTGGAGTTCAGAC<br>GTGTGCTCTTCCGATCTCTGAGACATAAGAAAACCTTACATTAAAAAA<br>TACAT |
| 8-INT_F  | AATGATACGGCGACCACCGAGATCTACACTCTTTCCCTACACGACGCT<br>CTTCCGATCTCTACGTGATAGGTCTTGTTTTACACCCTGA                  |
| 8-INT_R  | CAAGCAGAAGACGGCATAACGAGATGCGGACGTGACTGGAGTTCAGAC<br>GTGTGCTCTTCCGATCTGAGGTGATGGCACTGACATG                     |
| 9-INT_F  | AATGATACGGCGACCACCGAGATCTACACTCTTTCCCTACACGACGCT<br>CTTCCGATCTACTCGTGATTAGGATGCTCAGAGTTTTCTGTGA               |
| 9-INT_R  | CAAGCAGAAGACGGCATAACGAGATTTTTCACGTGACTGGAGTTCAGAC<br>GTGTGCTCTTCCGATCTCTATTCAAGGCACAGAGTGGG                   |
| 10-INT_F | AATGATACGGCGACCACCGAGATCTACACTCTTTCCCTACACGACGCT<br>CTTCCGATCTACATGACATATGCCTTAAACAATGAAGAAGC                 |
| 10-INT_R | CAAGCAGAAGACGGCATAACGAGATGGCCACGTGACTGGAGTTCAGAC<br>GTGTGCTCTTCCGATCTCTATTACAGATGGAAGTCACTTGGG                |
| 11-INT_F | AATGATACGGCGACCACCGAGATCTACACTCTTTCCCTACACGACGCT<br>CTTCCGATCTCTTTAAGAGCATAGAAGGAGTGGCT                       |
| 11-INT_R | CAAGCAGAAGACGGCATAACGAGATCGAAACGTGACTGGAGTTCAGAC<br>GTGTGCTCTTCCGATCTGAAAACCTTTATAACTACTGTGTGTTAACAGA<br>C    |
| 12-INT_F | AATGATACGGCGACCACCGAGATCTACACTCTTTCCCTACACGACGCT<br>CTTCCGATCTGACCCCGGGCTGGTTTGATTCCCA                        |
| 12-INT_R | CAAGCAGAAGACGGCATAACGAGATCGTACGGTGACTGGAGTTCAGAC<br>GTGTGCTCTTCCGATCTATAAGTCTTGGCTGGTCTCAAACCTCACTGTG         |
| 13-INT_F | AATGATACGGCGACCACCGAGATCTACACTCTTTCCCTACACGACGCT<br>CTTCCGATCTAACTTTTCTTAAAGGAAAGTAATGGACCAGTGAAGG            |

|          |                                                                                                         |
|----------|---------------------------------------------------------------------------------------------------------|
| 13-INT_R | CAAGCAGAAGACGGCATAACGAGATT <u>GCCG</u> AGTGACTGGAGTTCAGAC<br>GTGTGCTCTCCGATCTGGTGAACAAGTATGGGTCACCAGCAC |
| 14-INT_F | AATGATACGGCGACCACCGAGATCTACACTCTTTCCCTACACGACGCT<br>CTCCGATCTATCGCTTTTAAATCAAGGCAAGCGGTGAAC             |
| 14-INT_R | CAAGCAGAAGACGGCATAACGAGAT <u>GCTACC</u> GTGACTGGAGTTCAGAC<br>GTGTGCTCTCCGATCTGTTCTTTCCATCACTGGTCACTAGCC |
